# Supplementary material
Source: Royal Society of Chemistry journal article supplement (doi:10.1039/d6gc00740f)
Supplement: d6gc00740f1.pdf [file d6gc00740f1.pdf]

## Supporting information

### Plastic waste boosted plasma-assisted ammonia synthesis process from N<sub>2</sub> and H<sub>2</sub>O

Hangtian Hu,<sup>1</sup> Wenping Li,<sup>1\*</sup> Hui Zheng,<sup>1</sup> Zheng Li,<sup>1</sup> Aiguo Wang,<sup>1</sup> Zhangxin Chen,<sup>2</sup> and Jinguang Hu<sup>1\*</sup>

<sup>1</sup> Department of Chemical and Petroleum Engineering, University of Calgary, 2500 University Drive, NW, Calgary, Alberta T2N 1N4, Canada

<sup>2</sup> Eastern Institute of Technology, Ningbo, Zhejiang, 315200, China

E-mail: [wenping.li@ucalgary.ca](mailto:wenping.li@ucalgary.ca) ; [jinguang.hu@ucalgary.ca](mailto:jinguang.hu@ucalgary.ca)

The calculation of specific energy input (SEI, kJ L<sup>-1</sup>) and energy efficiency (EE, mg/kWh) was shown below, where  $P_{total}$  is the input power (The input power used in this work refers to the applied plasma generator power, rather than the directly measured discharge power),  $Q$  is the total gas flow, and  $C_{NH_3}$  is the concentration of ammonia generated in the plasma process.

$$SEI = \frac{P_{total}}{Q}$$
$$EE_{NH_3} = \frac{C_{NH_3}}{SEI}$$

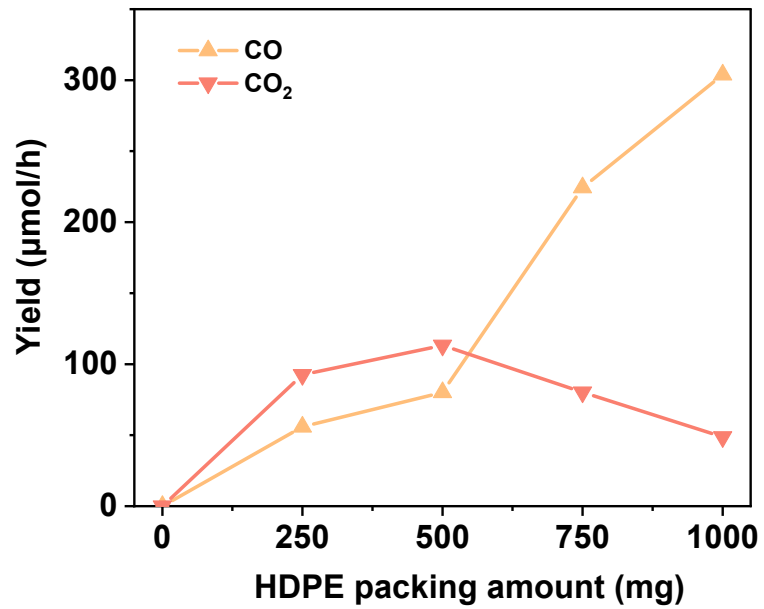

**Fig. S1** Effect of HDPE packing amount on CO and CO<sub>2</sub> yields (feeding gas: N<sub>2</sub> + H<sub>2</sub>O; flow rate: 10 SCCM; 2.64 mol% H<sub>2</sub>O; input power: 40 W).

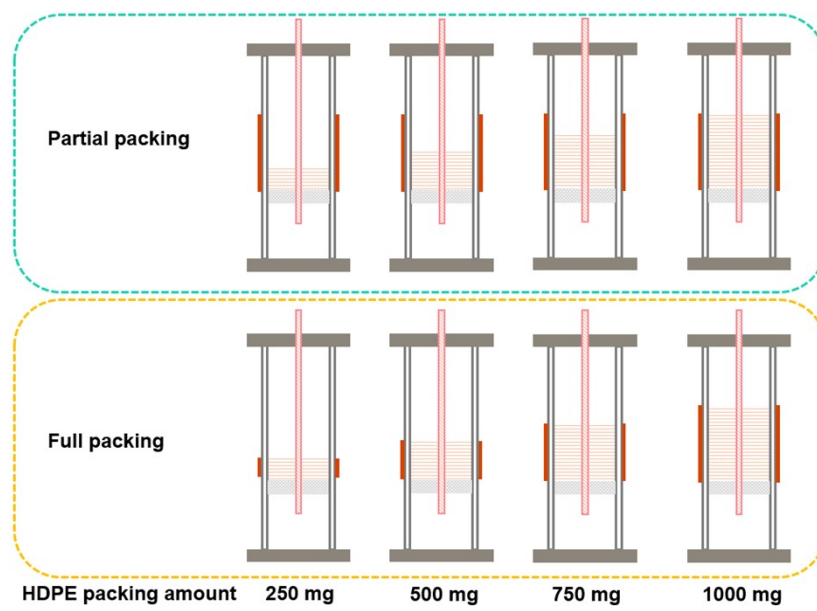

**Fig. S2** Comparison of partial and full packing reactors at different HDPE packing amount.

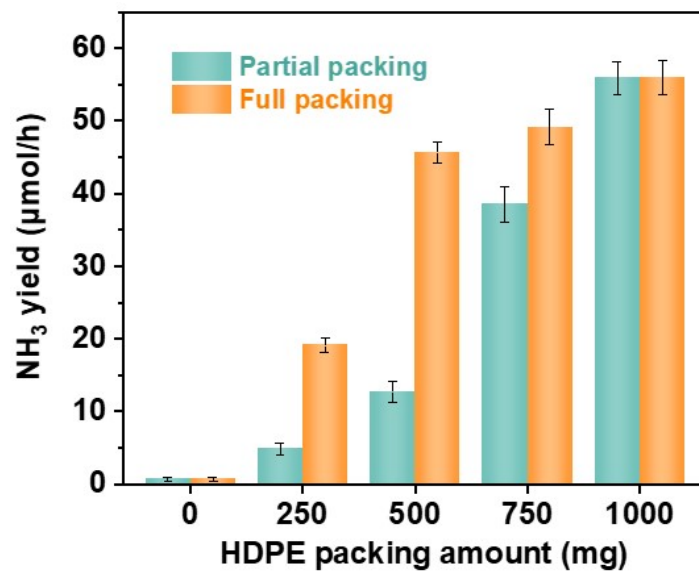

**Fig. S3** Comparison of NH<sub>3</sub> yields for full and partial packing reactors at different HDPE packing amount (full packing; feeding gas: N<sub>2</sub> + H<sub>2</sub>O; flow rate: 10 SCCM; 2.64 mol% H<sub>2</sub>O; input power: 40 W).

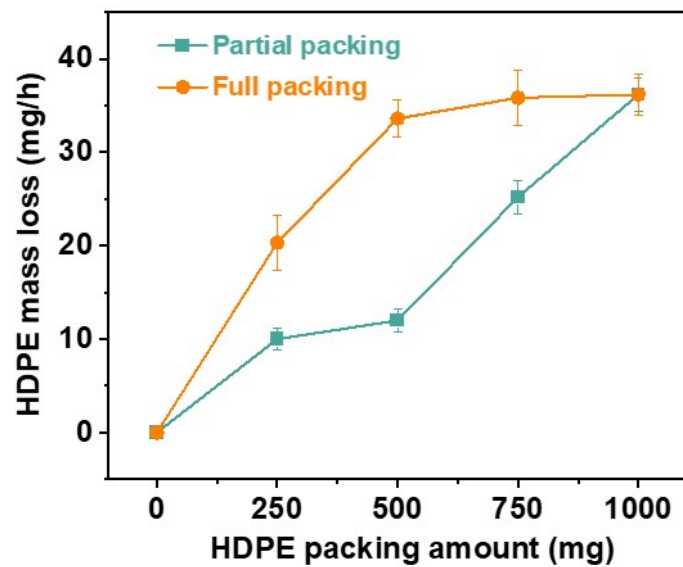

**Fig. S4** Comparison of HDPE amount loss for full and partial packing reactors at different HDPE packing amount (full packing; feeding gas:  $N_2 + H_2O$ ; flow rate: 10 SCCM; 2.64 mol%  $H_2O$ ; input power: 40 W).

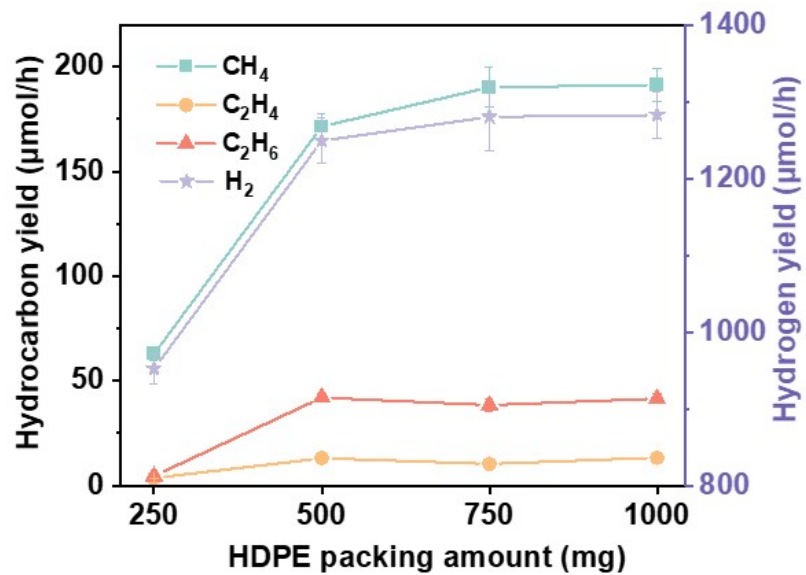

**Fig. S5** Effect of HDPE packing amount on gaseous product yields (full packing; feeding gas: N<sub>2</sub> + H<sub>2</sub>O; flow rate: 10 SCCM; 2.64 mol% H<sub>2</sub>O; input power: 40 W).

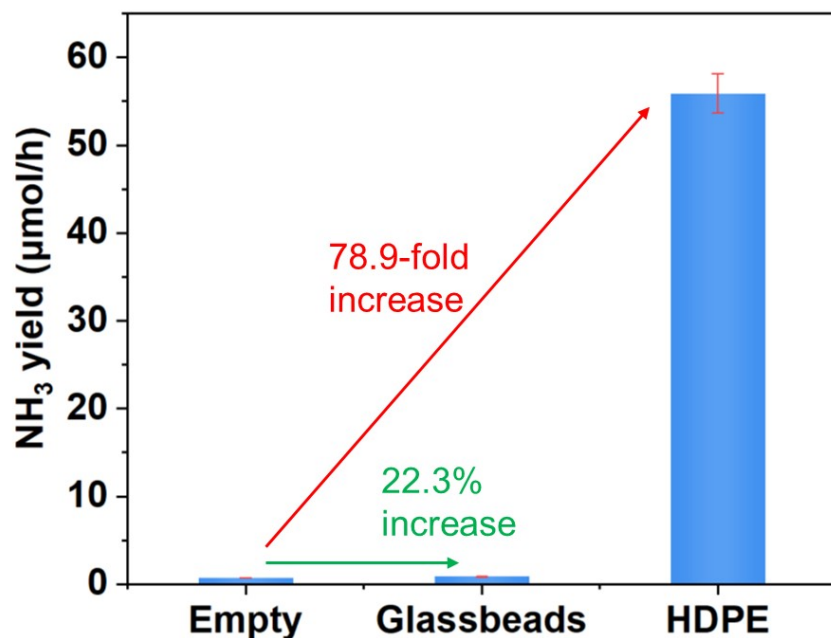

**Fig. S6** Comparison of NH<sub>3</sub> yield over empty, glass bead-packed, and HDPE-packed DBD reactors. Reaction condition: full packing; feeding gas: N<sub>2</sub> + H<sub>2</sub>O; flow rate: 10 SCCM; HDPE packing amount: 1000 mg; 2.64 mol% H<sub>2</sub>O; input power: 40 W.

It should be noted that the introduction of HDPE packing may modify the discharge characteristics of the DBD reactor, including local electric field distribution and energy dissipation behavior. Because direct electrical diagnostics were not available in the present work, the observed enhancement is discussed as a combined result of discharge modification and changes in the reaction environment.

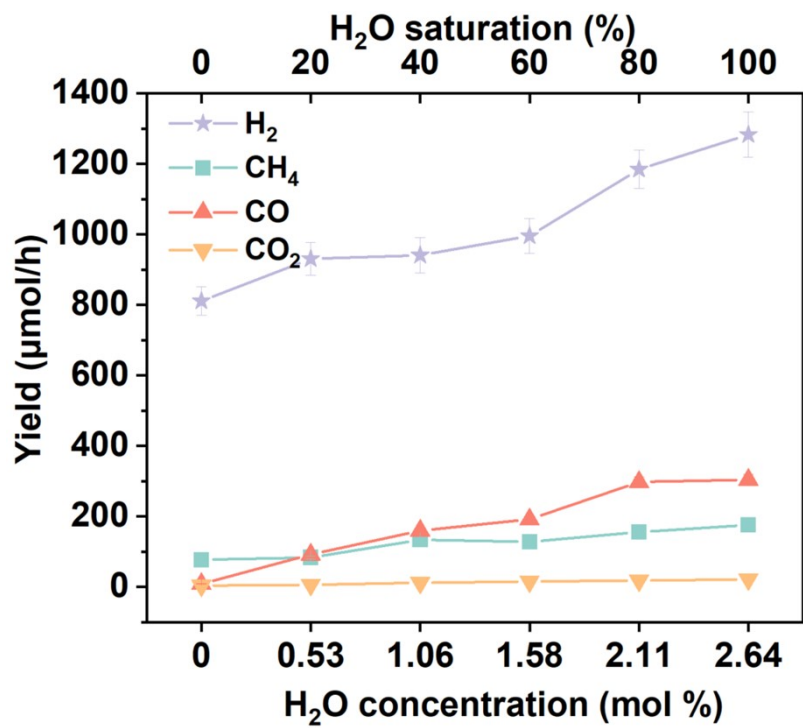

**Fig. S7** Effect of H<sub>2</sub>O concentration on gaseous product yields (full packing; feeding gas: N<sub>2</sub>; flow rate: 10 SCCM; HDPE packing amount: 1000 mg; input power: 40 W).

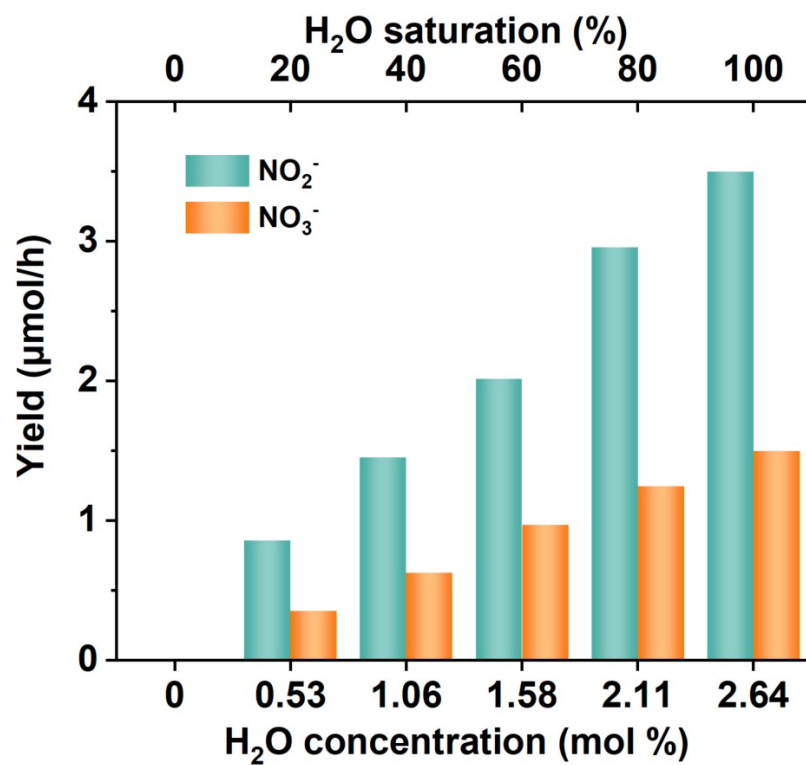

**Fig. S8** Comparison of NO<sub>2</sub><sup>-</sup> and NO<sub>3</sub><sup>-</sup> yields at different H<sub>2</sub>O concentrations in the feed gas. (full packing; feeding gas: N<sub>2</sub>; flow rate: 10 SCCM; HDPE packing amount: 1000 mg; input power: 40 W).

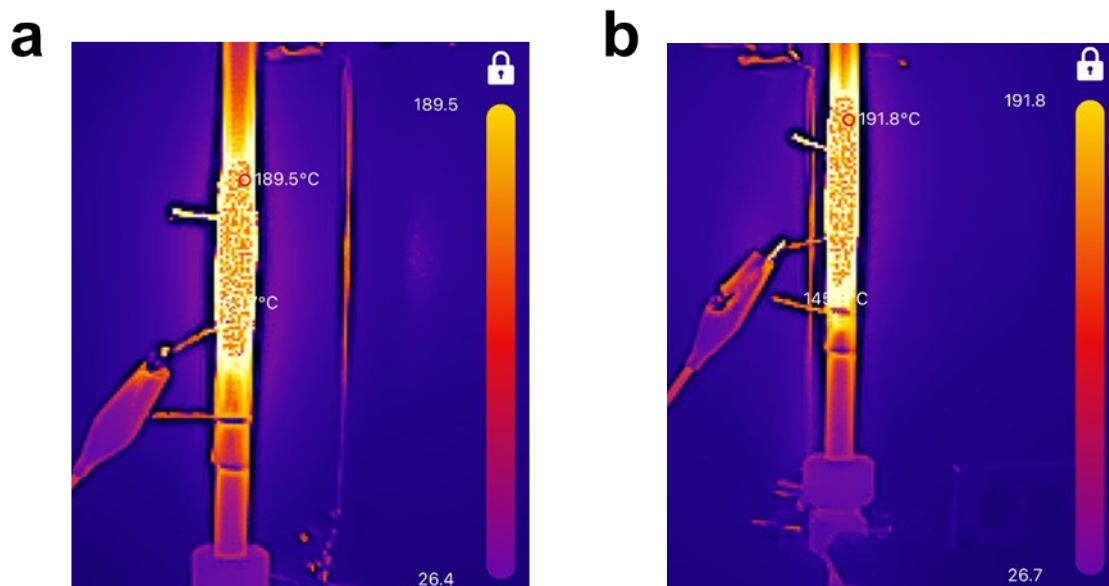

**Fig. S9** Infrared thermal images of the reactor under identical reaction conditions: (a) empty tube and (b) HDPE-packed tube (feeding gas: N<sub>2</sub>; flow rate: 10 SCCM; input power: 40 W).

Regarding temperature, the reactor temperature was monitored externally during operation using an infrared thermal camera (TOPDON TC002C). Repeated measurements showed that, when the applied input power was fixed at 40 W, the measured outer-wall temperature in the discharge region remained approximately 190 °C. Within the investigated range, no obvious difference in the outer-wall temperature was observed with varying H<sub>2</sub>O content or HDPE packing amount under the same applied input power. These results have been added to the revised supporting information.

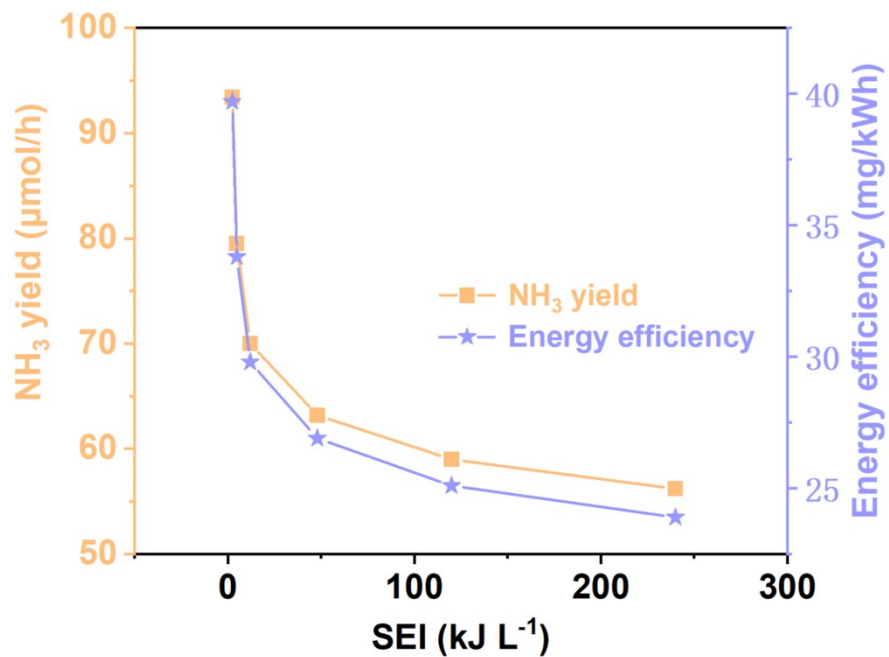

**Fig. S10** Effect of SEI on NH<sub>3</sub> yield and energy efficiency (full packing; feeding gas: N<sub>2</sub> + H<sub>2</sub>O; input power: 10 SCCM; 2.64 mol% H<sub>2</sub>O; HDPE packing mass: 1000 mg; flow rate increased from 10 to 1000 sccm).

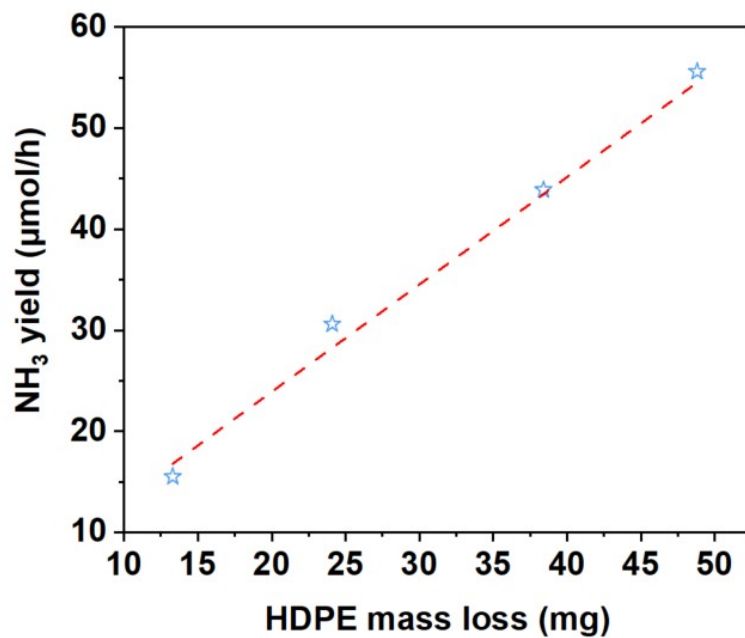

**Fig. S11** Relationship between NH<sub>3</sub> yield and HDPE mass loss. Reaction condition: full packing; feeding gas: N<sub>2</sub> + H<sub>2</sub>O; flow rate: 10 SCCM; HDPE packing amount: 1000 mg; 2.64 mol% H<sub>2</sub>O; input power: 40 W.

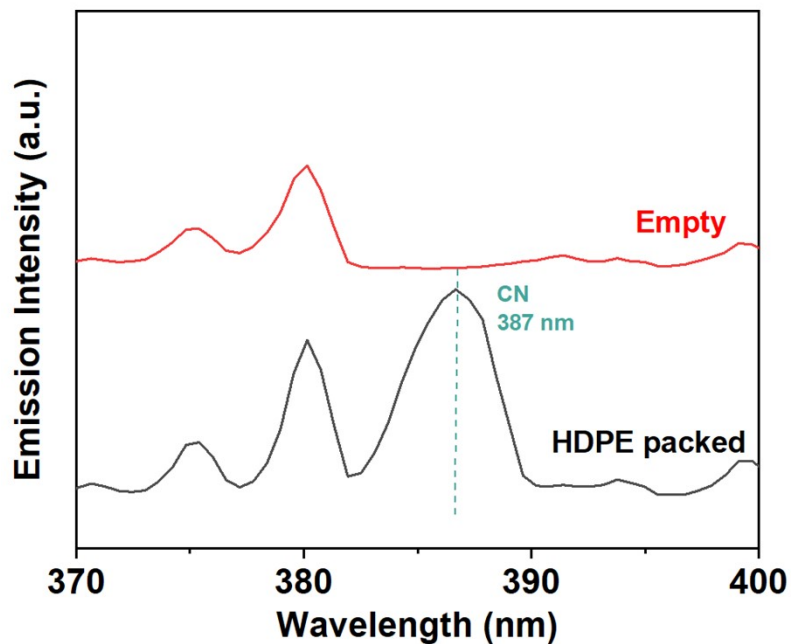

**Fig. S12** Comparison of N<sub>2</sub> activation and optical emission spectrum for N<sub>2</sub>-H<sub>2</sub>O plasma between a full packing HDPE (1000 mg) reactor and an empty reactor (370-400 nm).

**Table. S1** Repeatability analysis of NH<sub>3</sub> yield for different reaction conditions

|                     | NH <sub>3</sub> yield |       |       |       |       | RSD   |
|---------------------|-----------------------|-------|-------|-------|-------|-------|
| Ar/W                | 0.00                  | 0.00  | 0.00  | 0.00  | 0.00  | 0     |
| Ar/P                | 0.00                  | 0.00  | 0.00  | 0.00  | 0.00  | 0     |
| N <sub>2</sub> /W   | 0.069                 | 0.070 | 0.069 | 0.072 | 0.070 | 1.75% |
| N <sub>2</sub> /P   | 31.11                 | 37.39 | 35.21 | 34.52 | 36.12 | 6.77% |
| N <sub>2</sub> /W/P | 53.91                 | 55.96 | 57.23 | 53.75 | 59.00 | 4.02% |

**Table S2.** Comparative summary of this work and representative literature reports on NH<sub>3</sub> production rate and energy efficiency across electrified NH<sub>3</sub> synthesis systems.

| <b>Plasma N<sub>2</sub> reduction</b>                  |                              |                                                 |                                                             |                                                     |                                                     |           |
|--------------------------------------------------------|------------------------------|-------------------------------------------------|-------------------------------------------------------------|-----------------------------------------------------|-----------------------------------------------------|-----------|
| Plasma type                                            | Hydrogen source              | Gas feed                                        | Catalyst                                                    | NH <sub>3</sub> yield (mg h <sup>-1</sup> )         | Specific energy consumption (kWh kg <sup>-1</sup> ) | Ref       |
| DBD                                                    | H <sub>2</sub> O vapor       | N <sub>2</sub>                                  | Ru/MgO                                                      | 3.49 - 4.52                                         | 6383-15459                                          | 1         |
| DBD                                                    | H <sub>2</sub> O vapor       | N <sub>2</sub>                                  | γ-Al <sub>2</sub> O <sub>3</sub>                            | 0.073                                               | 131062                                              | 2         |
| DBD                                                    | H <sub>2</sub> O vapor       | N <sub>2</sub>                                  | 5-rGO-TiO <sub>2</sub>                                      | 21.40                                               | 758.9                                               | 3         |
| Plasma electrolytic system                             | H <sub>2</sub> O electrolyte | N <sub>2</sub>                                  | N/A                                                         | 0.44                                                | 2270                                                | 4         |
| DBD                                                    | H <sub>2</sub> O droplet     | N <sub>2</sub>                                  | N/A                                                         | 0.18                                                | 125000                                              | 5         |
| DBD/UV                                                 | H <sub>2</sub> O             | N <sub>2</sub>                                  | N/A                                                         | 0.034                                               | N/A                                                 | 6         |
| Plasma jet                                             | H <sub>2</sub> O vapor       | N <sub>2</sub>                                  | N/A                                                         | 0.064                                               | 1552–1928                                           | 7         |
| DBD                                                    | H <sub>2</sub> O vapor       | N <sub>2</sub>                                  | N/A                                                         | 0.44                                                | 118482                                              | This work |
| DBD                                                    | H <sub>2</sub> O vapor       | N <sub>2</sub>                                  | HDPE                                                        | 1.65                                                | 30864                                               | This work |
| <b>Direct electrocatalytic N<sub>2</sub> reduction</b> |                              |                                                 |                                                             |                                                     |                                                     |           |
| Electrolyte                                            | Gas feed                     | Catalyst                                        | NH <sub>3</sub> yield                                       | Specific energy consumption (kWh kg <sup>-1</sup> ) | Ref                                                 |           |
| 0.1 M Na <sub>2</sub> SO <sub>4</sub>                  | N <sub>2</sub>               | Janus-Ni/MoO <sub>2</sub>                       | 5.87 × 10 <sup>-3</sup> mg h <sup>-1</sup> cm <sup>-2</sup> | 16.1                                                | 8                                                   |           |
| acidic H <sub>2</sub> SO <sub>4</sub> (pH=2)           | N <sub>2</sub>               | WO <sub>x</sub> N <sub>y</sub> /WO <sub>3</sub> | 19.6 × 10 <sup>-3</sup> mg h <sup>-1</sup> cm <sup>-2</sup> | 16.3                                                | 9                                                   |           |
| 0.1 M Na <sub>2</sub> SO <sub>4</sub>                  | N <sub>2</sub>               | Ru-VOH                                          | 0.115 mg h <sup>-1</sup> mg <sub>cat</sub> <sup>-1</sup>    | 13.1                                                | 10                                                  |           |

|                                       |                |       |                                                                      |       |    |
|---------------------------------------|----------------|-------|----------------------------------------------------------------------|-------|----|
| 0.1 M HCl                             | N <sub>2</sub> | ZnTe  | $19.9 \times 10^{-3} \text{ mg h}^{-1} \text{ mg}_{\text{cat}}^{-1}$ | 138.7 | 11 |
| 0.1 M Na <sub>2</sub> SO <sub>4</sub> | N <sub>2</sub> | CNMS  | $71.1 \times 10^{-3} \text{ mg h}^{-1} \text{ mg}_{\text{cat}}^{-1}$ | 38.9  | 12 |
| 10 M LiCl                             | N <sub>2</sub> | SAB/C | $58.1 \times 10^{-3} \text{ mg h}^{-1} \text{ cm}^{-2}$              | 10.2  | 13 |

---

### Li-mediated N<sub>2</sub> reduction

---

| Electrolyte                                        | Gas feed                   | Key design                                   | NH <sub>3</sub> FE (%) | Specific energy consumption (kWh kg <sup>-1</sup> ) | Ref |
|----------------------------------------------------|----------------------------|----------------------------------------------|------------------------|-----------------------------------------------------|-----|
| 1.0 M LiBF <sub>4</sub> , THF                      | N <sub>2</sub> ,<br>1 bar  | Phenol as proton shuttle and buffer          | 72                     | 34.4                                                | 14  |
| 1 M LiBF <sub>4</sub> , THF, 0.25 vol% EtOH        | N <sub>2</sub>             | LiBF <sub>4</sub> salt screening             | 61                     | 39.7                                                | 15  |
| THF/LiTFSI + TTE antisolvent                       | N <sub>2</sub> ,<br>20 bar | Localized high-concentration electrolyte     | 73.6                   | N/A                                                 | 16  |
| 2 M lithium difluoro(oxalato)borate                | N <sub>2</sub>             | Enhanced Li-ion diffusion                    | 98                     | 24.6                                                | 17  |
| High-concentration imide-based Li salt electrolyte | N <sub>2</sub>             | Compact ionic layering, interfacial assembly | Near 100               | 30.4                                                | 18  |

---

**Table. S3** Carbon balance calculation in an hour process. Reaction condition: full packing; feeding gas: N<sub>2</sub> + H<sub>2</sub>O; flow rate: 10 SCCM; HDPE packing amount: 1000 mg; 2.64 mol% H<sub>2</sub>O; input power: 40 W.

| Mass of carbon (mg) |                    |                               |      |                 |                      |              |
|---------------------|--------------------|-------------------------------|------|-----------------|----------------------|--------------|
| HDPE<br>carbon loss | Gaseous byproducts |                               |      |                 | Liquid<br>byproducts | Error<br>(%) |
|                     | CH <sub>4</sub>    | C <sub>2</sub> H <sub>6</sub> | CO   | CO <sub>2</sub> |                      |              |
| 34.40               | 2.17               | 1.12                          | 3.94 | 0.72            | 24.45                | 5.52         |

**Table. S4** Hydrogen balance calculation in an hour process. Reaction condition: full packing; feeding gas: N<sub>2</sub> + H<sub>2</sub>O; flow rate: 10 SCCM; HDPE packing amount: 1000 mg; 2.64 mol% H<sub>2</sub>O; input power: 40 W.

| Mass of hydrogen (mg) |                                  |                    |                 |                               |                      |                 |              |
|-----------------------|----------------------------------|--------------------|-----------------|-------------------------------|----------------------|-----------------|--------------|
| HDPE<br>hydrogen loss | H <sub>2</sub> O<br>dissociation | Gaseous byproducts |                 |                               | Liquid<br>byproducts | NH <sub>3</sub> | Error<br>(%) |
|                       |                                  | H <sub>2</sub>     | CH <sub>4</sub> | C <sub>2</sub> H <sub>6</sub> |                      |                 |              |
| 7.70                  | 0.78                             | 2.60               | 0.73            | 0.28                          | 4.08                 | 0.17            | 8.18         |

## References:

1. T. Zhang, R. Zhou, S. Zhang, R. Zhou, J. Ding, F. Li, J. Hong, L. Dou, T. Shao, A. B. Murphy, K. Ostrikov and P. J. Cullen, *Energy Environ. Mater.*, 2022, **6**, e12344.
2. J. Feng, P. Ning, K. Li, X. Sun, C. Wang, L. Jia and M. Fan, *ACS Sustain. Chem. Eng.*, 2023, **11**, 804-814.
3. S. Song, F. Wang, X. Sun, Y. Chen, J. Liu, Y. Shi, P. Ning, Y. Ma and K. Li, *ACS Catal.*, 2025, **15**, 17603-17613.
4. S. G. Ryan Hawtof, Evan Guarr, Cheyan Xu, R. Mohan Sankaran, Julie Nicole Renner, *Sci. Adv.*, 2019, **5**, eaat5778.
5. J. R. Toth, N. H. Abuyazid, D. J. Lacks, J. N. Renner and R. M. Sankaran, *ACS Sustain. Chem. Eng.*, 2020, **8**, 14845-14854.
6. T. Sakakura, S. Uemura, M. Hino, S. Kiyomatsu, Y. Takatsuji, R. Yamasaki, M. Morimoto and T. Haruyama, *Green Chem.*, 2018, **20**, 627-633.
7. Y. Gorbanev, E. Vervloessem, A. Nikiforov and A. Bogaerts, *ACS Sustain. Chem. Eng.*, 2020, **8**, 2996-3004.
8. L. Li, Y. Li, K. Li, W. Zou, H. Li, Y. Li, L. Li, Q. Zhang, C. Zhang, X. Zhang, D. Tian and L. Jiang, *ACS Nano*, 2025, **19**, 1080-1089.
9. Z. Zhang, C. Kondratowicz, J. Smith, P. Kucheryavy, J. Ouyang, Y. Xu, E. Desmet, S. Kurdziel, E. Tang, M. Adeleke, A. D. Lele, J. M. Martirez, M. Chi, Y. Ju and H. He, *ACS Energy Lett.*, 2025, **10**, 3349-3358.
10. Y. Sun, X. Li, Z. Wang, L. Jiang, B. Mei, W. Fan, J. Wang, J. Zhu and J. M. Lee, *J. Am. Chem. Soc.*, 2024, **146**, 7752-7762.
11. S. J. Mane, N. B. Joseph, R. Kumari, A. Narayan and A. J. Bhattacharyya, *ACS Mater. Au.*, 2024, **4**, 582-591.
12. R. Liu, T. Guo, H. Fei, Z. Wu, D. Wang and F. Liu, *Adv. Sci. (Weinh)*, 2022, **9**, e2103583.
13. M. Wang, S. Liu, H. Ji, T. Yang, T. Qian and C. Yan, *Nat. Commun.*, 2021, **12**, 3198.
14. X. Fu, A. Xu, J. B. Pedersen, S. Li, R. Sazinas, Y. Zhou, S. Z. Andersen, M. Saccoccio, N. H. Deissler, J. B. V. Mygind, J. Kibsgaard, P. C. K. Vesborg, J. K. Nørskov and I. Chorkendorff, *Nat. Commun.*, 2024, **15**, 2417.

15. X. Fu, S. Li, N. H. Deissler, J. B. V. Mygind, J. Kibsgaard and I. Chorkendorff, *ACS Energy Lett.*, 2024, **9**, 3790-3795.
16. H. Yun, C. Lim, M. Kwon, D. Lee, Y. Yun, D. H. Seo and K. Yong, *Adv. Mater.*, 2024, **36**, e2408280.
17. H. L. Qiang Zhang, Peiping Yu, Pengyu Liu, Ning Sun, Yiyan Wang, Chunlai Tu, Yiping Liu, Yan Wang, Xinyang Yue, Linlin Ma, Wen Wen, Jinyang Xu, Zhaofeng Liang, Jingyuan Ma, Fei Song, Zheng Liang, Hao Sun, Daishun Ling, Hongyan Liang, Feng Liu, Yongfeng Hu, Tao Cheng, Jun Li, *Science*, 2026, **391**, 724-729.
18. H. L. Du, M. Chatti, R. Y. Hodgetts, P. V. Cherepanov, C. K. Nguyen, K. Matuszek, D. R. MacFarlane and A. N. Simonov, *Nature*, 2022, **609**, 722-727.
19. M. Guláš, C. S. Cojocaru, F. Le Normand and S. Farhat, *Plasma Chem. Plasma Process.*, 2007, **28**, 123-146.
20. H. M. Nguyen, F. Gorky, S. Guthrie and M. L. Carreon, *Catal. Today*, 2023, **418**, 114141.
